# Supplementary material for: Ferricyanide-based analysis of aqueous lignin suspension revealed sequestration of water-soluble lignin moieties
Source: Royal Society of Chemistry journal article supplement (doi:10.1039/c6ra04443c), 2016-01-01
Supplement: c6ra04443c1.pdf [file c6ra04443c1.pdf]

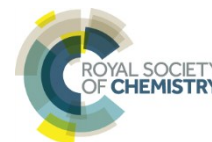

Journal Name

ARTICLE

**Ferricyanide-based analysis of aqueous lignin suspension revealed sequestration of water-soluble lignin moieties**

Received 00th January 20xx,  
Accepted 00th January 20xx

C.J. Joshua,<sup>a,b\*</sup> B. A. Simmons<sup>a,b</sup> and S. W. Singer<sup>a,b</sup>

DOI: 10.1039/x0xx00000x

[www.rsc.org/](http://www.rsc.org/)

<sup>a</sup> Joint BioEnergy Institute, Emeryville, California 94608

<sup>b</sup> Biological and Systems Engineering Division, Lawrence Berkeley National Laboratory, Berkeley, CA 94720

\*Corresponding author: E-mail: [cjjoshua@lbl.gov](mailto:cjjoshua@lbl.gov); P: +1-510-486-5348; F: +1-510-486-4252

† Footnotes relating to the title and/or authors should appear here.

Electronic Supplementary Information (ESI) available: [details of any supplementary information available should be included here]. See

DOI: 10.1039/x0xx00000x

## Journal Name

## ARTICLE

**Electronic Supplementary Information (ESI)****Protocol S1: Lignin preparation****Protocol S1: Preparation of Klason lignin from switchgrass**

The acid-insoluble (Klason) lignin extract was prepared following a modification of previously described protocol. Approximately 500 ml of 72% sulfuric acid was added to 150 g of Putnam switchgrass ( $\geq 60$  mesh) in clean glass beaker containing stir bar and incubated at 30°C (400 rpm) for 60 min. The slurry was diluted with 500 mL of DI-water and incubated for additional 60 min at 30°C (200 rpm). The volume of the suspension was adjusted to 4 L with DI-water and autoclaved at 121°C (15 p.s.i) 60 min in sealed pressurized bottle. The hydrolysate was incubated at 4°C for at least 2 h to precipitate the acid-insoluble lignin extract. The sediment was re-suspended in 3 – 6 L of DI-water and filtered through Miracloth (Millipore, Billerica, MA). The retentate was washed with 1 L of DI-water and re-suspended in 300 – 350 mL of DI-water. The acid-insoluble lignin suspension was treated with adding 100 mL of 72% sulfuric acid and incubated at 30°C (200 rpm) for 60 min. The slurry was diluted with 1 L of DI-water and autoclaved at 121°C (15 p.s.i) for 60 min. The hydrolysate was precipitated at 4°C for at least 2 h and filtered through Miracloth. The retentate was washed with DI-water until the pH of filtrate was  $\sim 7.0$ . The washed acid-insoluble (Klason) lignin extract was snap-froze in liquid nitrogen and lyophilized.

**Protocol S2: Preparation of aqueous lignin suspensions from switchgrass and *Eucalyptus***

The Klason lignin from switchgrass and ionic-liquid derived lignin from *Eucalyptus* were washed and size fractionated to generate uniform suspension and remove soluble lignin moieties. Approximately 1.0 – 5.0 g of each lignin extract was moistened with DI-water and ground into fine paste with mortar and pestle. The ground lignin extracts were re-suspended in 50 – 100 mL of DI-water and sequentially filtered through 60, 40 and 20  $\mu\text{m}$  Steri-flip nylon membrane filters (Millipore, MA). The 20  $\mu\text{m}$  filtrates were filtered through a 0.2  $\mu\text{m}$  Steri-flip membrane filter (Millipore, MA) to remove soluble lignin and low molecular weight moieties. The 0.2  $\mu\text{m}$  retentate from each lignin extract was washed by re-suspending in DI-water and sequentially filtered through 20 and 0.2  $\mu\text{m}$  membrane filters to further remove large aggregates and soluble low molecular weight moieties. The washing step was repeated until each 0.2  $\mu\text{m}$  filtrate was colorless. Finally, the 0.2  $\mu\text{m}$  retentate from each lignin extracts was re-suspended in DI-water and filtered through 20  $\mu\text{m}$  Steri-flip filter. Each resulting uniform lignin suspension containing particles ( $\leq 20$   $\mu\text{m}$  particles) was autoclaved at 121°C (15 psi) for 30 - 35 min and incubated overnight at 30°C to induce germination of heat resistant spores and spore-forming microbes. The sterilization-incubation cycle was repeated two more times to ensure complete sterilization of the lignin suspensions.

## Supplementary Figures:

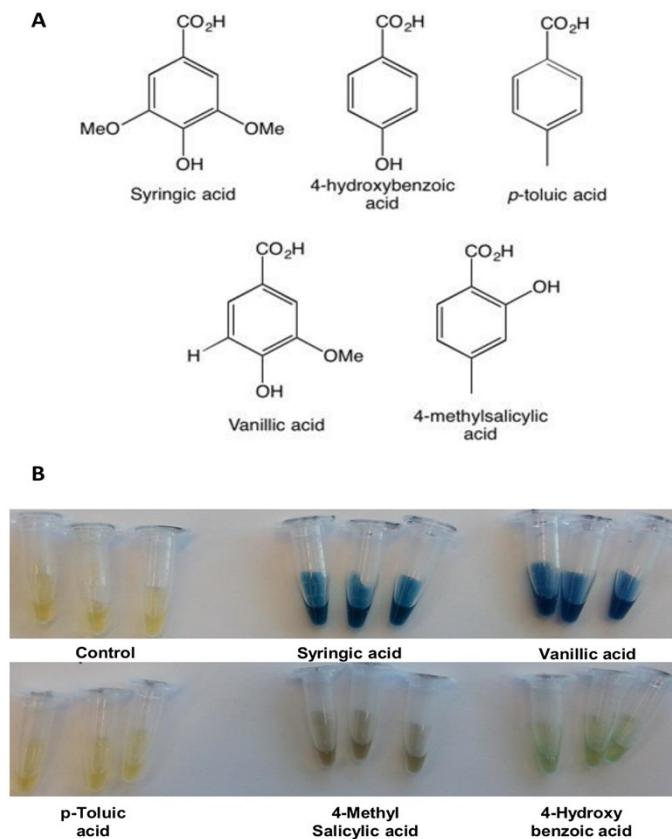

Figure S1: Phenolic and non-phenolic benzoic acid monomers. (A) Molecular structures and (B) Prussian blue production from ferricyanide reaction

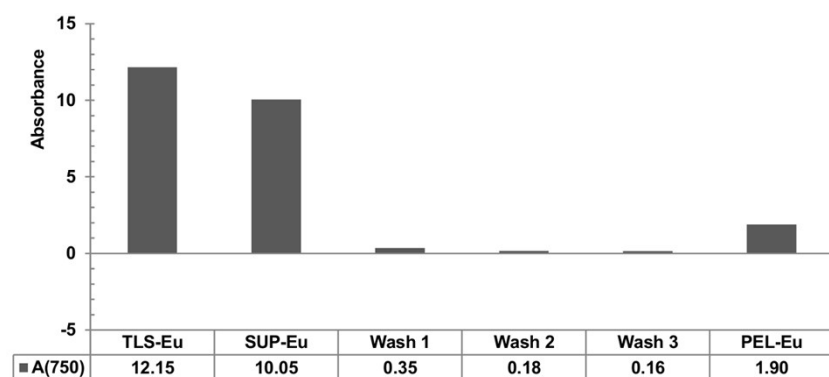

Figure S2. Ferricyanide analysis of lignin extracts from *Eucalyptus* (Eu). Ferricyanide activity of total lignin suspension (TLS), supernatant (SUP) containing soluble lignin moieties, pellet (PEL) from *Eucalyptus*. The supernatant was filtered through 0.45  $\mu$ m filter, while the pellet was washed three times with DI-water (Wash 1 – 3). The ferricyanide activity of each samples was determined at 750 nm wavelength.

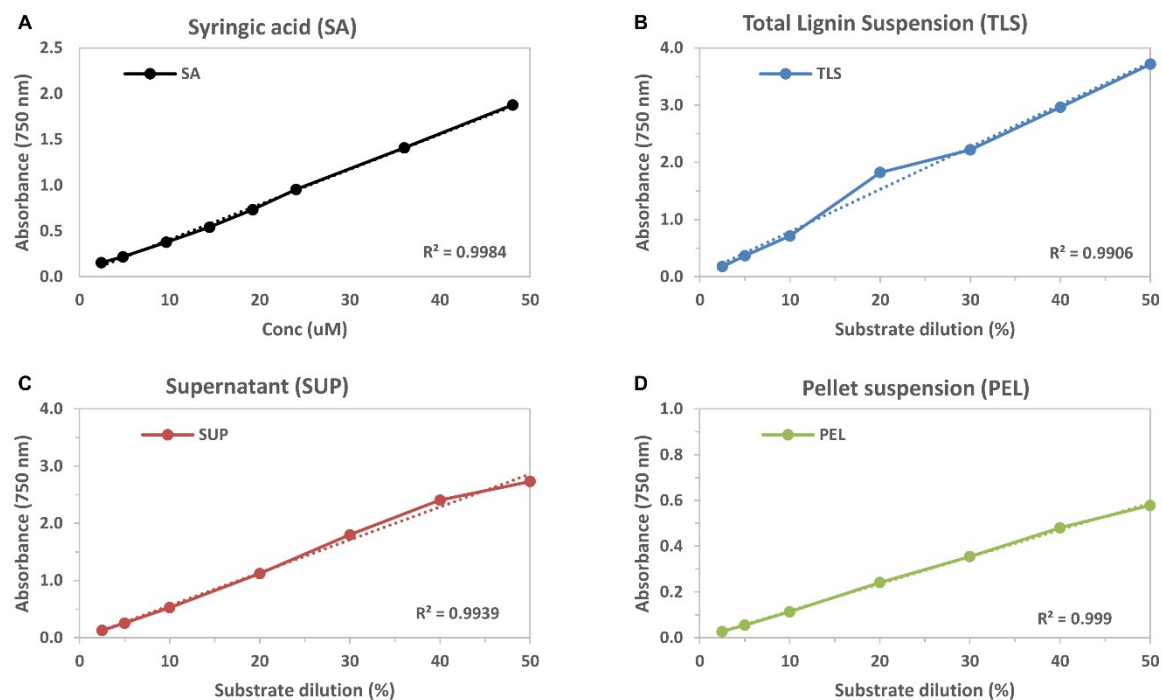

Figure S3: 96-well plate ferricyanide assay analysis of syringic acid and lignin extract from *Eucalyptus*: Plot of ferricyanide activity of different concentrations of syringic acid (A). Plot of ferricyanide activity of different dilutions of total lignin suspension (B), 0.2  $\mu\text{m}$  filtered supernatant (C) and pellet (D) from *Eucalyptus* lignin extract. Dotted lines represent trend-line ( $R^2$  values inserted). The supernatant and pellet were obtained by centrifuging the TLS at  $20,000 \times g$  for 30 min. The reaction was carried out in 96-well plate and the ferricyanide activity of each reaction was determined at 750 nm wavelength. The pellet was washed three times with DI-water.

## Supplementary Table S1: Minimal Salt Medium (MSM)

**Nutrient**      **Amount (g/L)** $\text{K}_2\text{HPO}_4$           1.6 $\text{KH}_2\text{PO}_4$           0.4 $\text{MgSO}_4 \cdot 7\text{H}_2\text{O}$     0.2 $\text{NaCl}$             0.1 $\text{FeSO}_4 \cdot 7\text{H}_2\text{O}$     0.003 $\text{CaCl}_2 \cdot 2\text{H}_2\text{O}$     0.025 $\text{NH}_4\text{NO}_3$           0.5

Dissolve salts in 1 L of DI-water (pH = 7.2 – 7.5) and filter sterilize using 0.2  $\mu\text{m}$  membrane filter. Medium can also be autoclaved without the  $\text{CaCl}_2 \cdot 2\text{H}_2\text{O}$ .

(MSM broth was adapted from Berki and Khan, 1986)

## Reference:

1. R. M. Behki and S. U. Khan, *Journal of Agricultural and Food Chemistry*, 1986, 34, 746-749.
